# Supplementary material
Source: PeerJ journal article supplement (doi:10.7717/peerj-cs.3756)

# Learning in autonomous agents

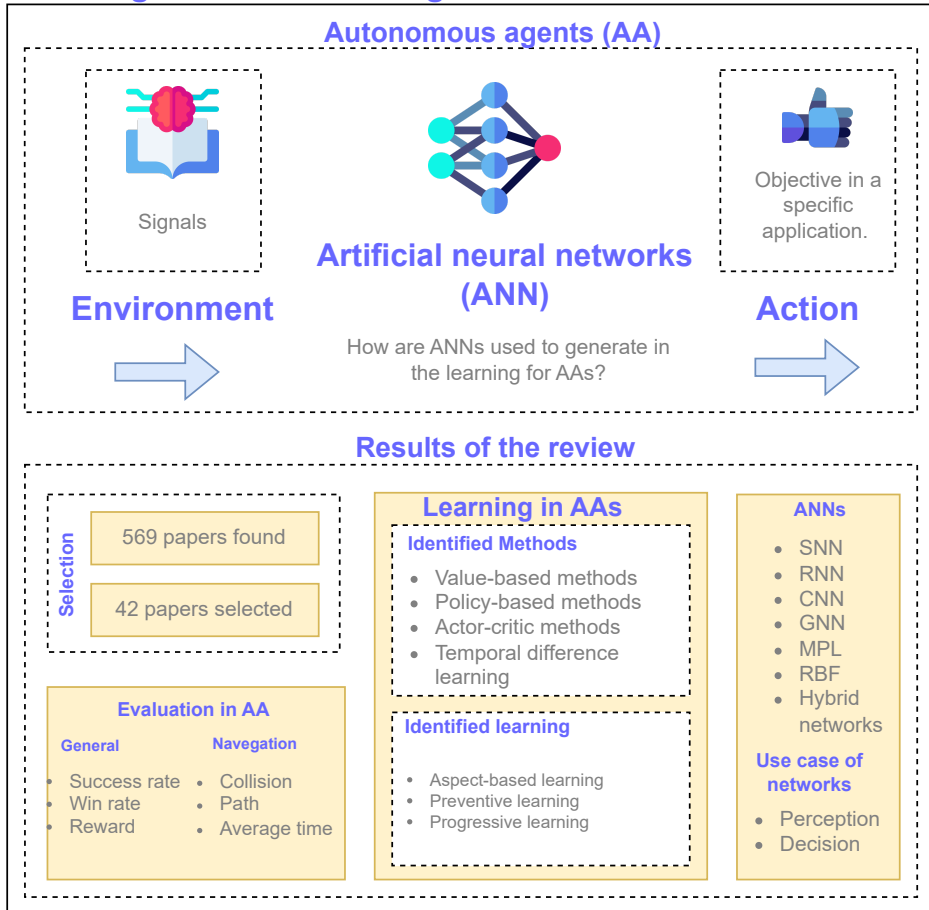

Supplement: Fig0_Graphical_Abstract_StaffAB.pdf [file Fig0_Graphical_Abstract_StaffAB.pdf]
